# Supplementary material
Source: PubMed Central journal article supplement (PMC5748491)
Supplement: 10.1194_D078535_jlr.D078535-1.pdf [file 10.1194_D078535_jlr.D078535-1.pdf]

**A**

S#: 7722 FULL: PRO: 300 CT: 0.52 #A: 9 9.36e5

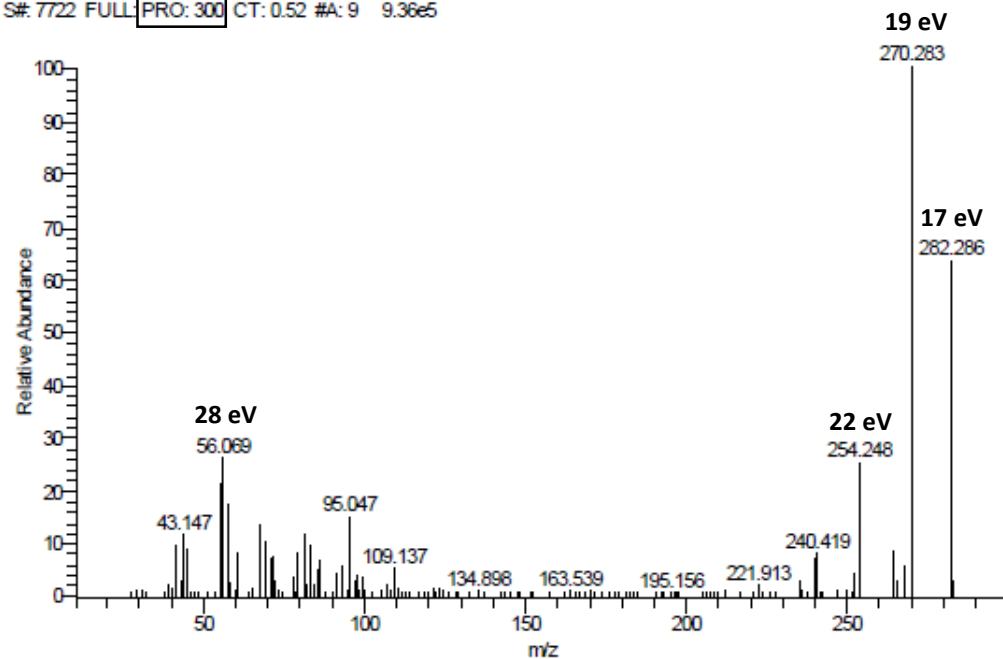**B**

S#: 7018 FULL: PRO: 302 CT: 0.53 #A: 9 3.81e6

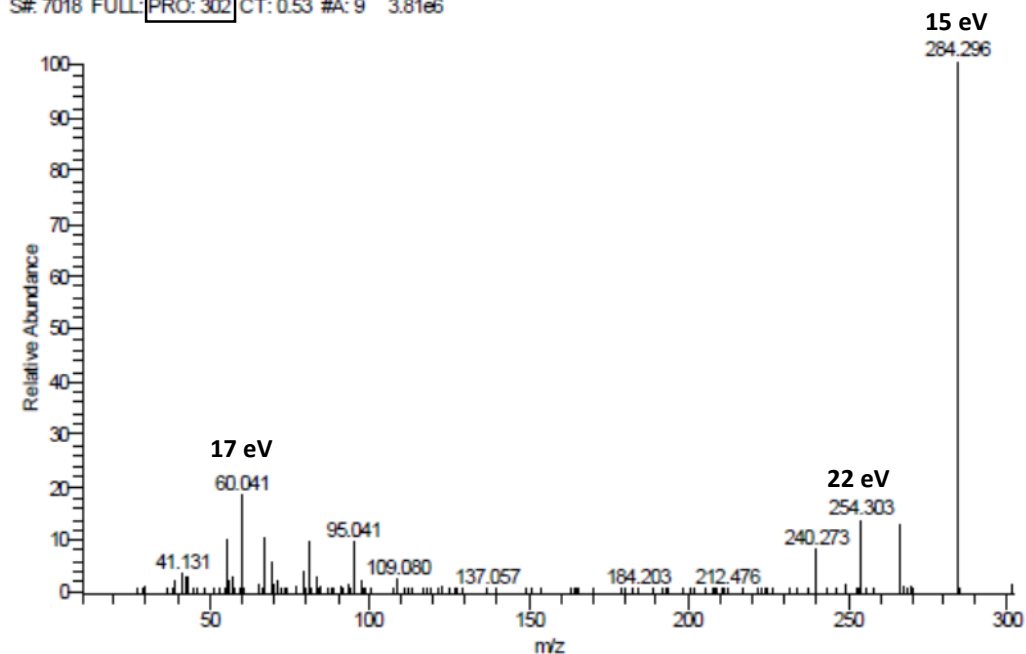

**Supplemental Figure S1. Product ion spectrums of 3KDS and DHS generated from compound optimization report.** Compounds were optimized using Thermo TSQ tune software for the most abundant fragment ions. 300 m/z and 302 m/z corresponding to 3KDS (A) and DHS(B) respectively, was fragmented at 1.5 mTorr and product ions were monitored with full scan between 0-298 m/z and 0-300 m/z for 3KDS and DHS respectively. Collision energy for each abundant product ion was also shown.

A

S#: 12975 FULL PRO: 286 CT: 0.51 #A: 9 2.99e8

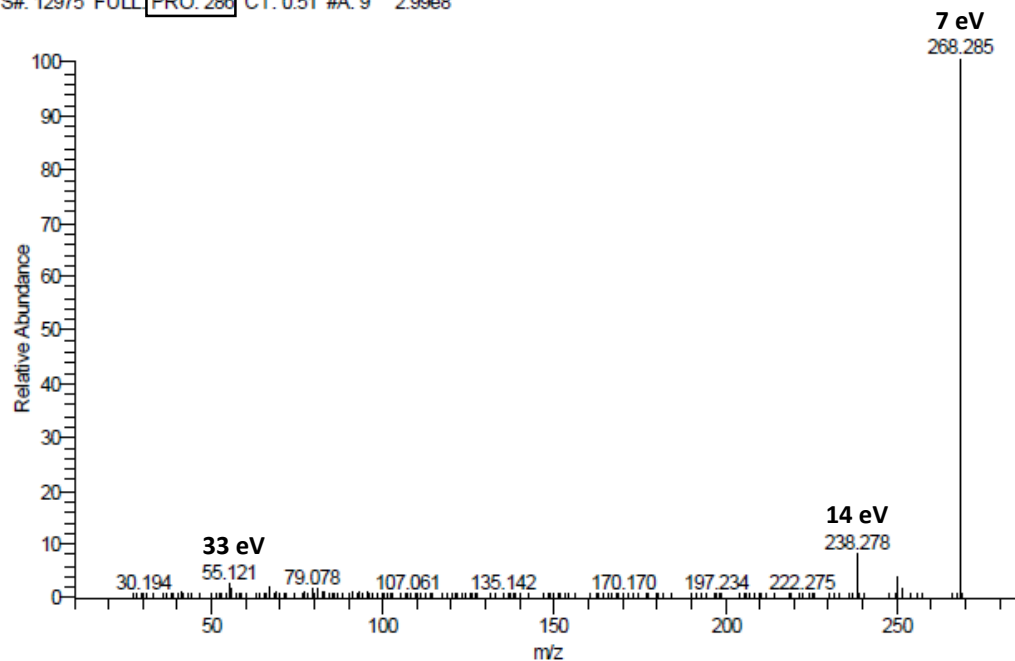

B

RT: 22.41 - 32.41 SM: 1G

RT: 27.41

NL: 2.25E5

Base Peak m/z=

267.80-268.80 F: + c

ESI SRM ms2

286.300

[268.050-268.550]

MS ICIS C17-SPH

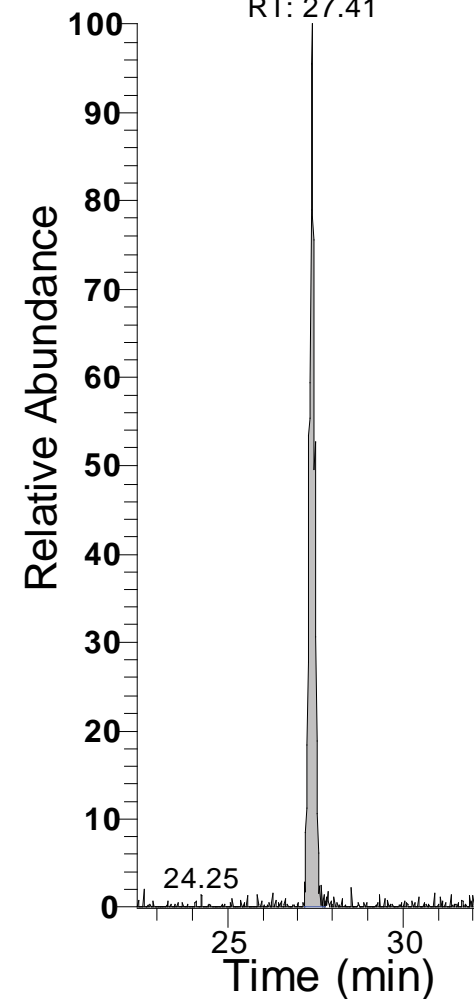

**Supplemental Figure S2. HPLC-ESI-MS/MS characterization of internal standard C17-SPH.** (A) Product ion spectrum of C17-SPH generated from Thermo TSQ tune software. 286 m/z corresponding to C17-SPH was fragmented at 1.5 mTorr and product ions were monitored with full scan between 0-284 m/z. Collision energy for each abundant fragment ion was also shown. (B) SRM peak of C17-SPH. Ion intensities, retention time and parent/product ion pairs are shown in the legends on the right.

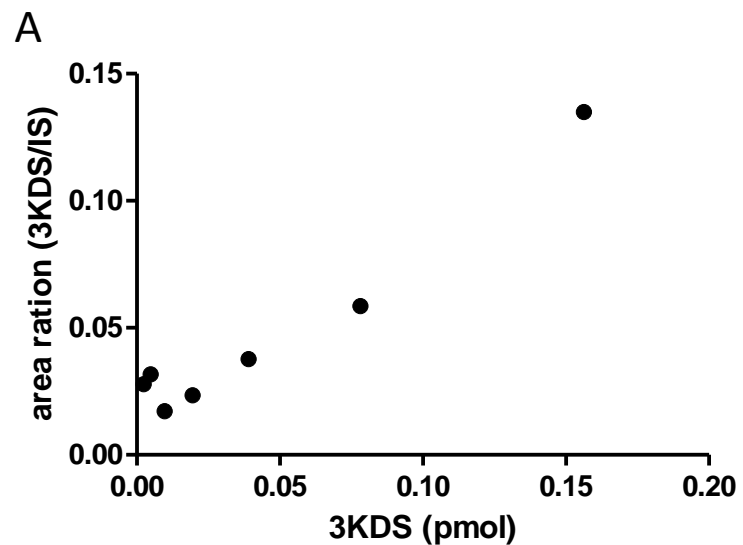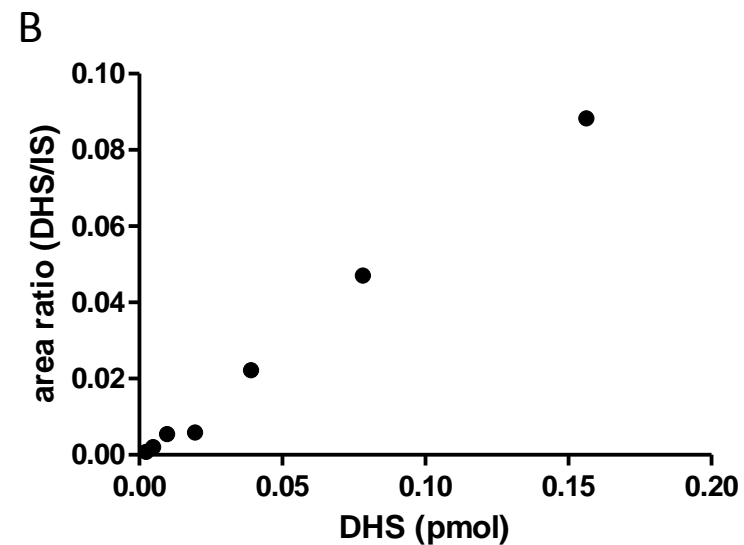

**Supplemental Figure S3. Detection of 3KDS (A) and DHS (B) that fall below the linear range of the standard curve.** 0.002 – 0.156 pmol of 3KDS (A) and DHS (B) were applied to HPLC followed by ESI-MS/MS using the same transition as in Fig 1. The absolute quantity of the analyte is plotted against the peak area ratio of the analyte to the internal standard (C17-SPH).

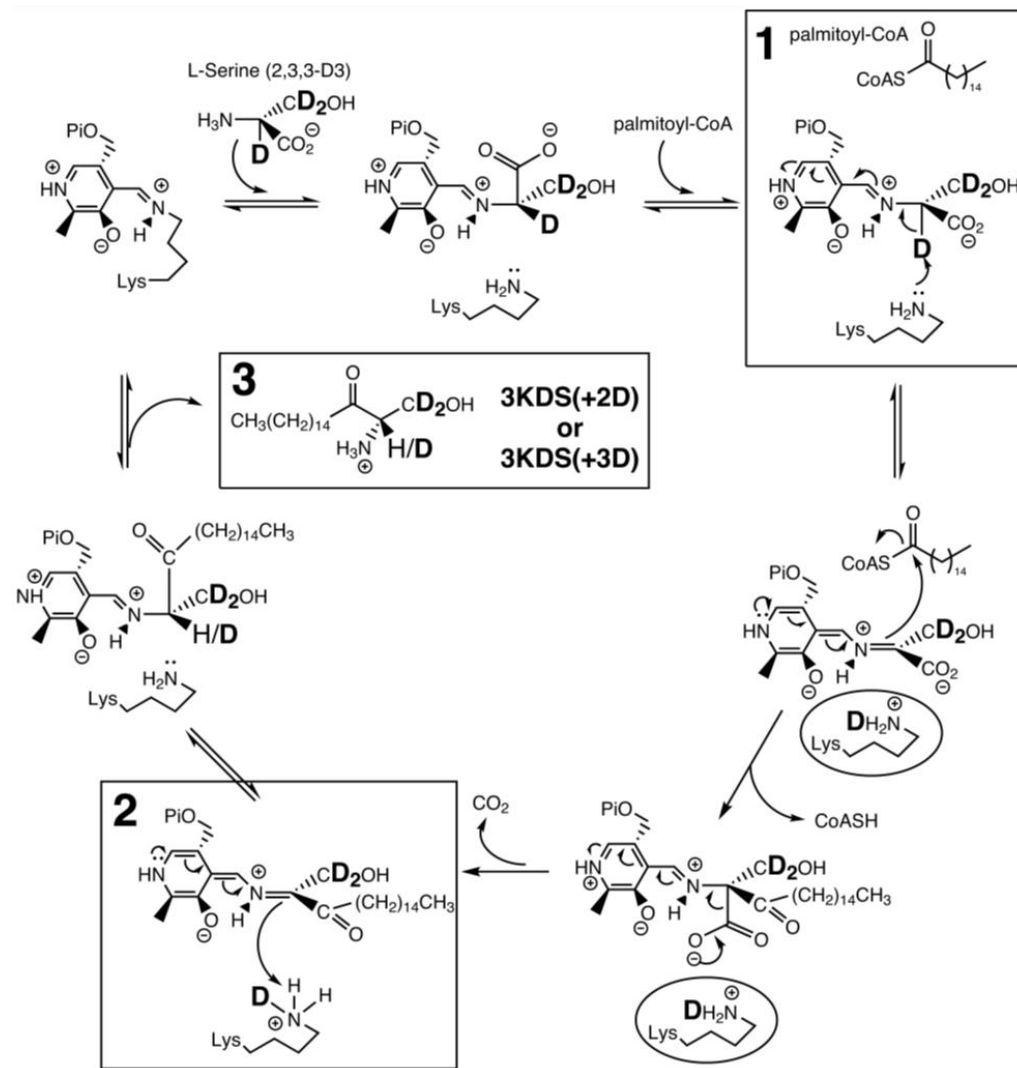

**Supplemental Figure S4. The fate of C2-deuterium from L-Ser (2,3,3-D3) predicted by the proposed PLP-dependent SPT catalytic mechanism.** This figure is modified from Raman et al., 2009 (10). Box 1 shows the deprotonation of the external aldimine formed between PLP and L-Ser (2,3,3-D3) with abstraction of C2-deuterium by active Lys residue (presumably Lys<sub>366</sub> on LCB2) upon binding of palmitoyl-CoA. The deuterated base is circled. The deuterium is retained on the lysine base presuming no hydrogen exchange occurs. Box 2 shows the re-protonation process of 3KDS product quinonoid by abstraction of hydrogen or deuterium from Lys<sub>366</sub> base. Box 3 shows the production of either 3KDS (+2D) or 3KDS (+3D) depending on which hydrogen or deuterium is abstracted.
